# Supplementary material for: Genetic diversity and profiles of genes associated with virulence and stress resistance among isolates from the 2010-2013 interagency Listeria monocytogenes market basket survey
Source: PubMed Central journal article supplement (PMC7192433; doi:10.1371/journal.pone.0231393), 2020-04-30
Supplement: pone.0231393.s001.pdf [file pone.0231393.s001.pdf]

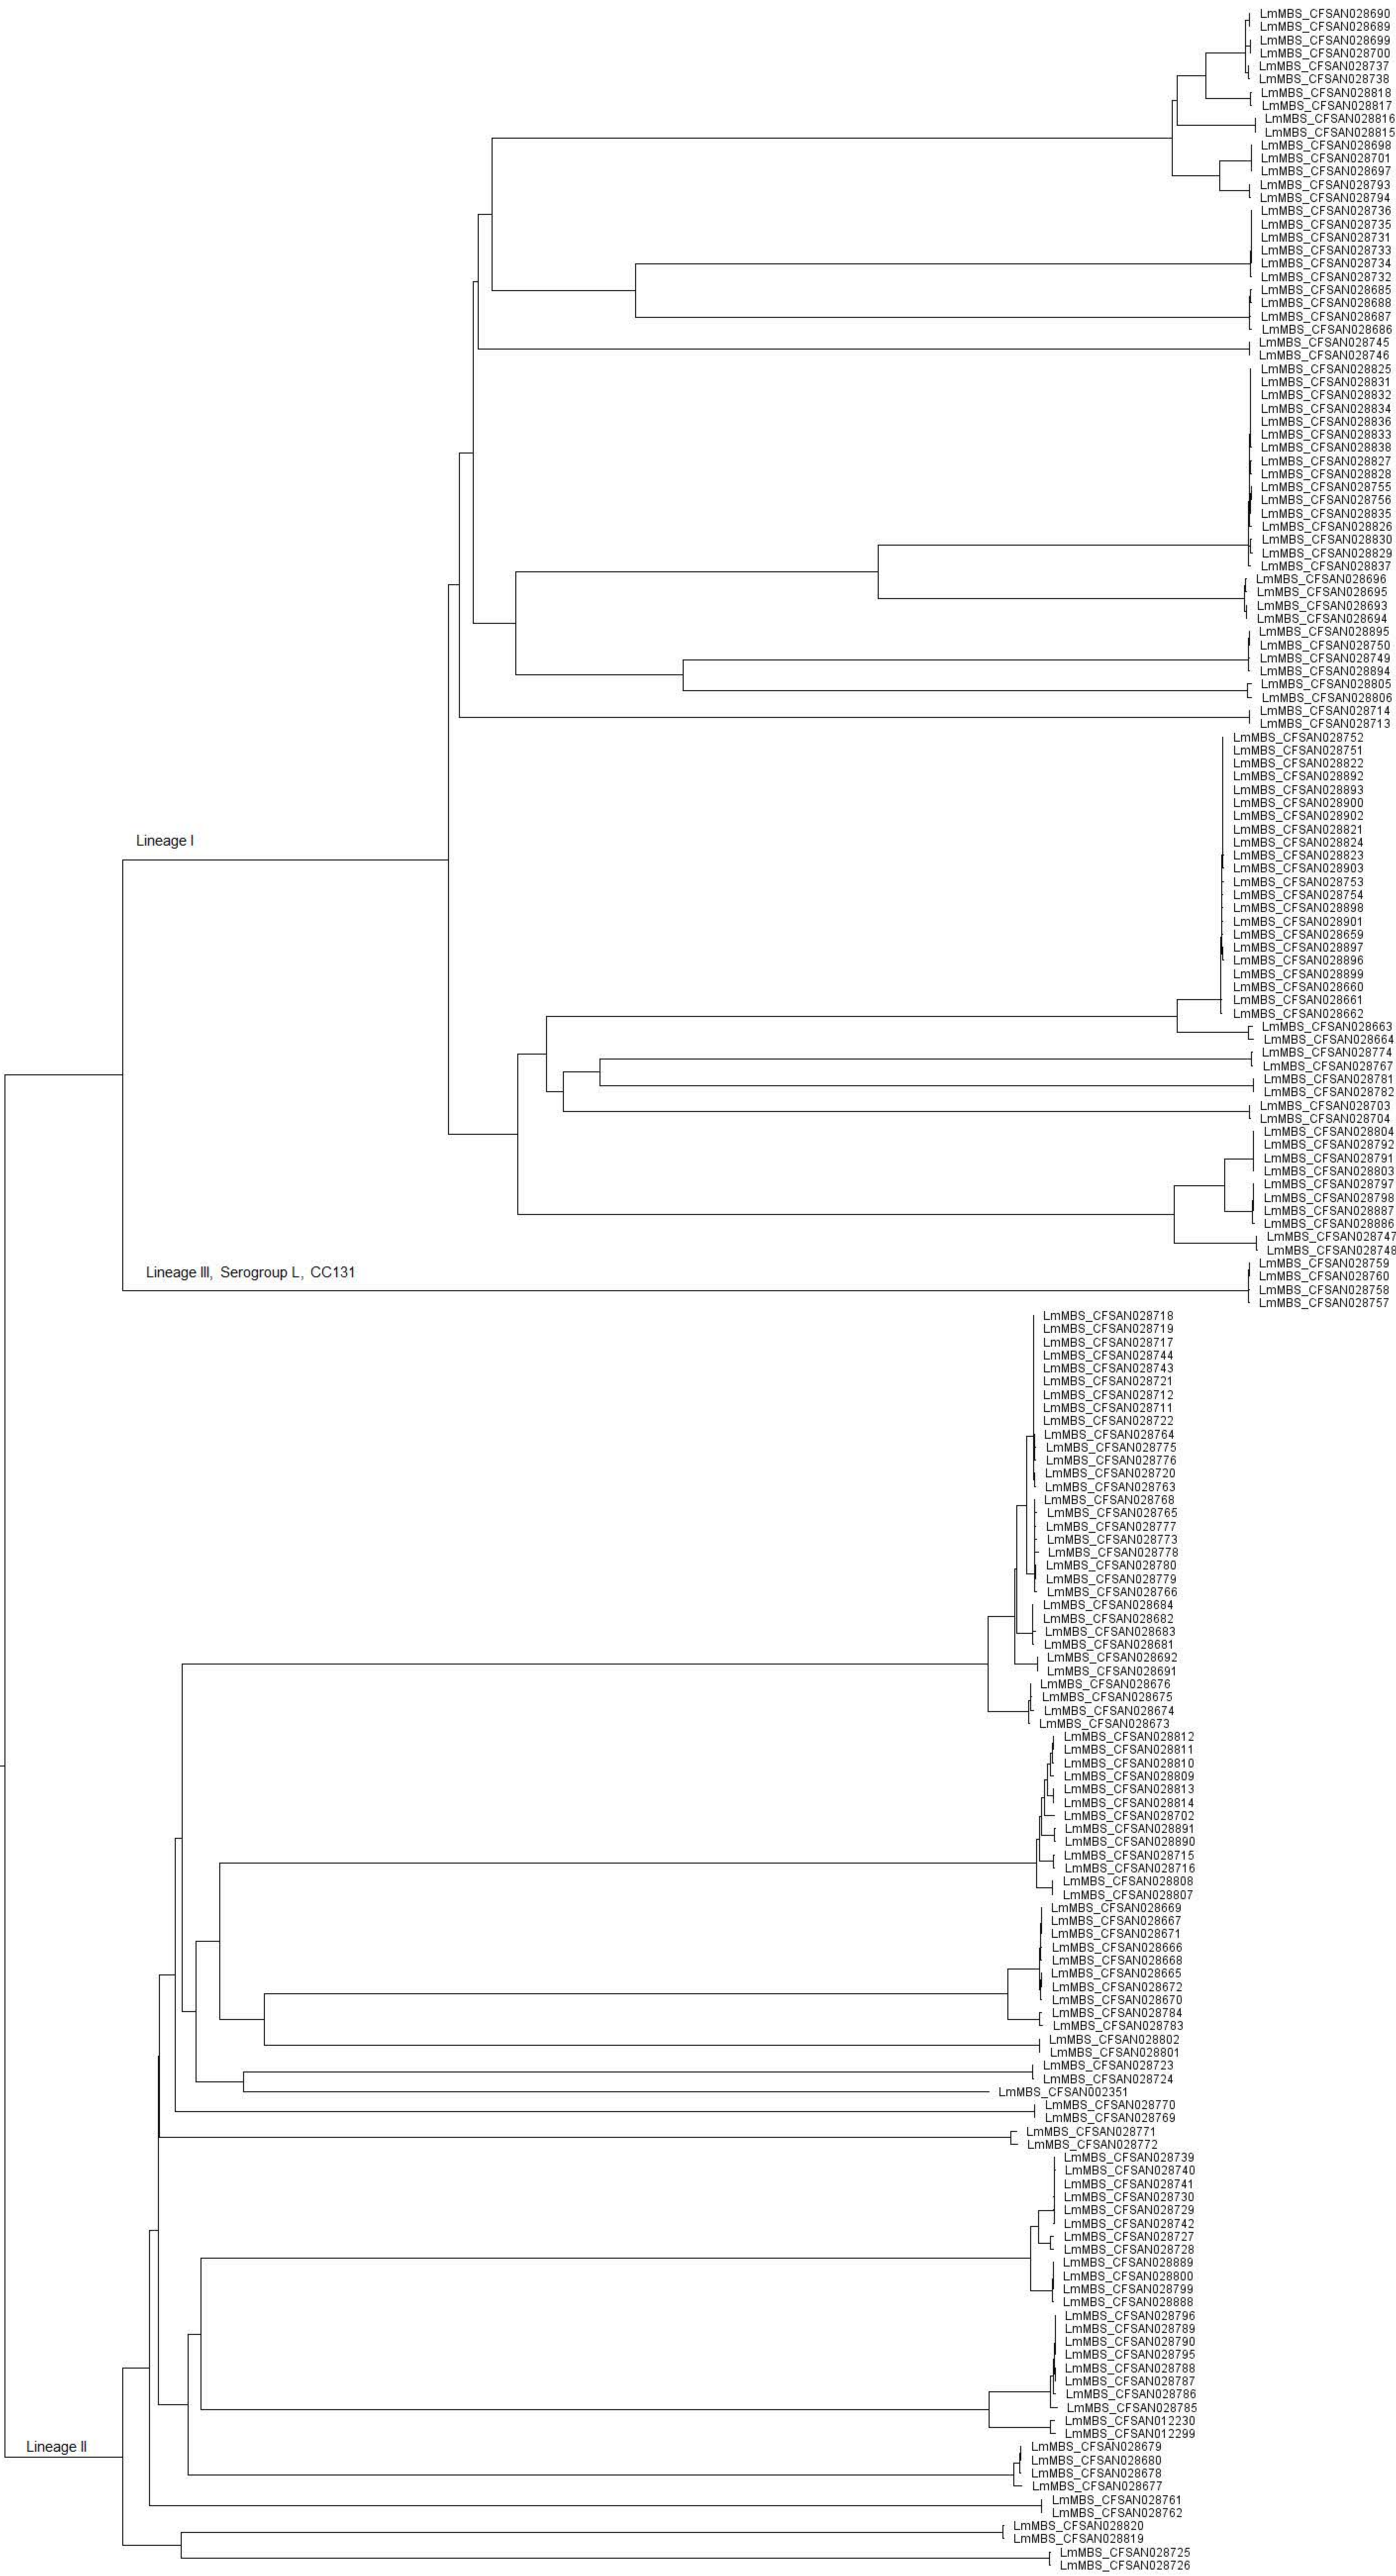

Lineage I

Lineage III, Serogroup L, CC131

Lineage II
