# Supplementary material for: Genetic diversity and profiles of genes associated with virulence and stress resistance among isolates from the 2010-2013 interagency Listeria monocytogenes market basket survey
Source: PubMed Central journal article supplement (PMC7192433; doi:10.1371/journal.pone.0231393), 2020-04-30

Figure S2. Diversity in clonal complex (CC) and sequence type (ST) of *L. monocytogenes* isolates (n=102) from the 2010-2013 LmMBS, by food categories.

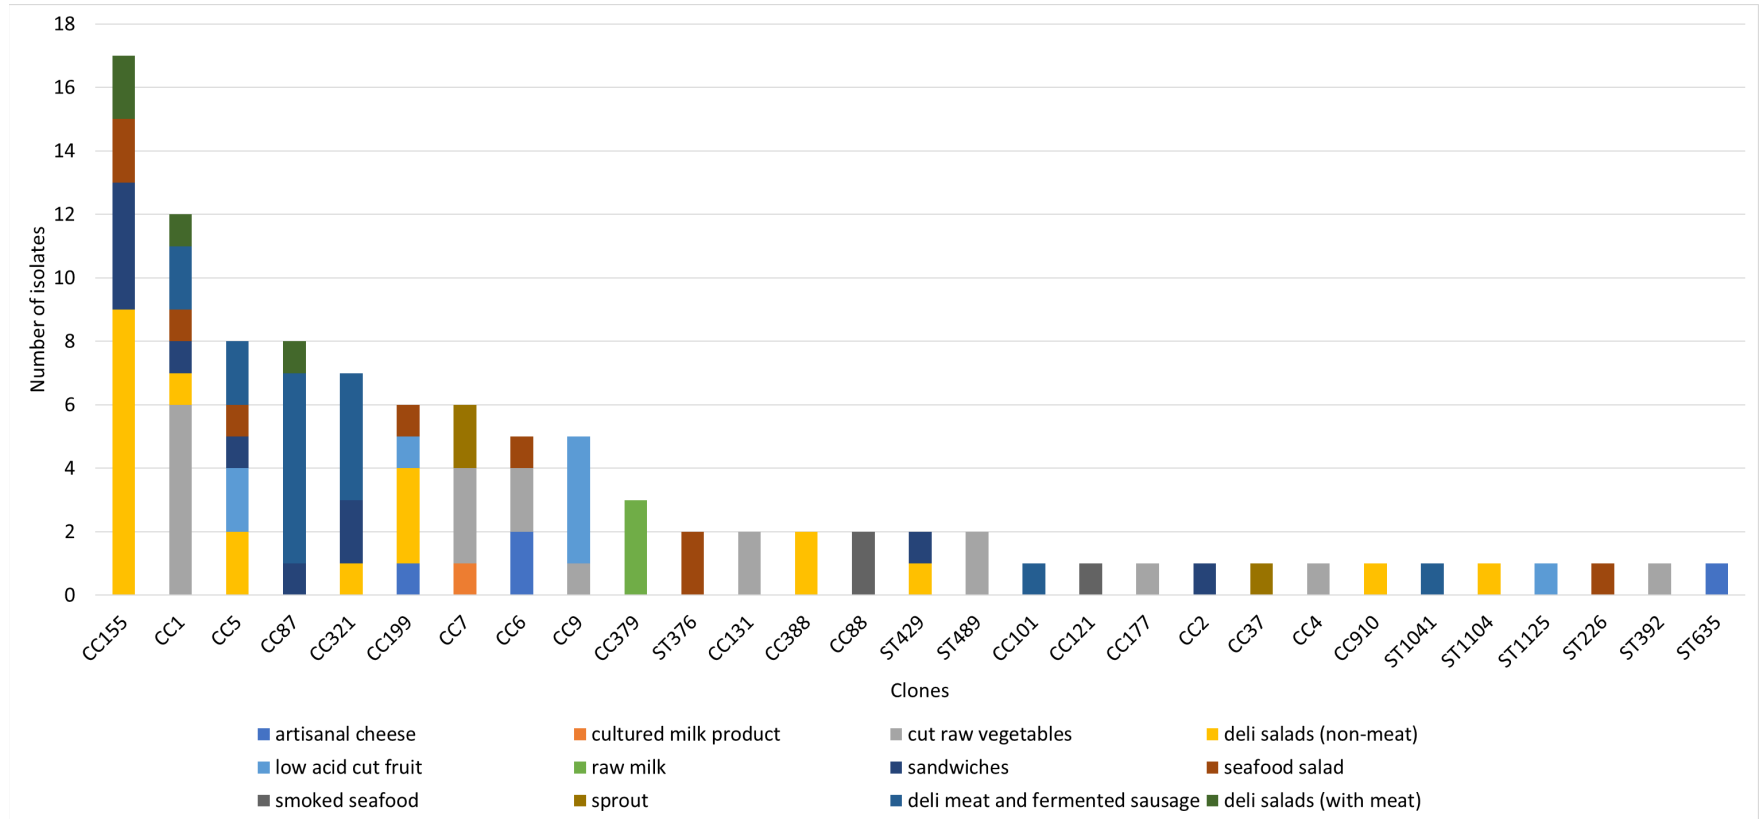

Supplement: pone.0231393.s002.pdf [file pone.0231393.s002.pdf]
