# Supplementary material for: Genetic diversity and profiles of genes associated with virulence and stress resistance among isolates from the 2010-2013 interagency Listeria monocytogenes market basket survey
Source: PLoS One. 2020 Apr 30;15(4):e0231393. doi: 10.1371/journal.pone.0231393 (PMC7192433; doi:10.1371/journal.pone.0231393)
Supplement: S2 Table — (XLSX) [file pone.0231393.s004.xlsx]

## Sheet: Sheet1
Table S2. Results for 195 L. monocytogenes isolates from the 2010-2013 LmMBSa.
LmMBS ID	CFSAN ID	SRA ID	Food Group	Food	State	Manufacturer Location	Collection Date	Sequence Type	Clonal Complex/Singleton	Serogroup	inlA premature stop codon	Assembled plasmid size (Kbp)	Sequencing coverage	N50	Percentage of good cgMLST targets (%)
300856-01	CFSAN002351	SRR1206160	Produce	Alfalfa Sprouts	CA	Prepackaged	2012-11-14	37	CC37	1/2a, 3a	no		98x	239620	99.9
1101236-38	CFSAN012230	SRR1763804	Produce	Alfalfa Sprouts	GA	Prepackaged	2014-01-06	7	CC7	1/2a, 3a	no	58	90x	225493	99.8
1101236-33	CFSAN012299	SRR1763840	Produce	Broccoli Sprouts	GA	Prepackaged	2014-01-06	7	CC7	1/2a, 3a	no	58	112x	264425	99.8
Lm MBS-4036	CFSAN028659	SRR1974125	Combination foods	Macaroni/Pasta Salad	GA	Made/ Sliced in Store	2011-01-28	1	CC1	4b, 4d, 4e	no		32x	668076	99.4
Lm MBS-4037	CFSAN028660	SRR1973877	Combination foods	Macaroni/Pasta Salad	GA	Made/ Sliced in Store	2011-01-28	1	CC1	4b, 4d, 4e	no		40x	540231	99.4
Lm MBS-4046	CFSAN028661	SRR8506359	Combination foods	Deli-type Salad - Chicken Salad	GA	Made/ Sliced in Store	2011-01-28	1	CC1	4b, 4d, 4e	no		120x	236031	99.1
Lm MBS-4047	CFSAN028662	SRR8506358	Combination foods	Deli-type Salad - Chicken Salad	GA	Made/ Sliced in Store	2011-01-28	1	CC1	4b, 4d, 4e	no		140x	120644	99.2
Lm MBS-4076	CFSAN028663	SRR1973897	Seafood	Shrimp Seafood Salad	CA	Made/ Sliced in Store	2011-02-04	1	CC1	4b, 4d, 4e	no	61	40x	1591519	99.5
Lm MBS-4077	CFSAN028664	SRR1970566	Seafood	Shrimp Seafood Salad	CA	Made/ Sliced in Store	2011-02-04	1	CC1	4b, 4d, 4e	no	61	35x	356744	99.5
Lm MBS-4131	CFSAN028665	SRR1973837	Produce	Cantaloupe	GA	Made/ Sliced in Store	2011-03-05	9	CC9	1/2c, 3c	no	67	102x	475822	99.9
Lm MBS-4132	CFSAN028666	SRR1974104	Produce	Cantaloupe	GA	Made/ Sliced in Store	2011-03-05	9	CC9	1/2c, 3c	no	66	149x	509378	99.9
Lm MBS-4141	CFSAN028667	SRR1974123	Produce	Cantaloupe	GA	Made/ Sliced in Store	2011-03-05	9	CC9	1/2c, 3c	no	71	106x	475822	99.9
Lm MBS-4142	CFSAN028668	SRR1973673	Produce	Cantaloupe	GA	Made/ Sliced in Store	2011-03-05	9	CC9	1/2c, 3c	no	68	44x	475809	99.9
Lm MBS-4151	CFSAN028669	SRR1973649	Produce	Cantaloupe	GA	Made/ Sliced in Store	2011-03-05	9	CC9	1/2c, 3c	no	69	54x	449033	99.9
Lm MBS-4152	CFSAN028670	SRR1973909	Produce	Cantaloupe	GA	Made/ Sliced in Store	2011-03-05	9	CC9	1/2c, 3c	no	71	54x	475820	99.9
Lm MBS-4161	CFSAN028671	SRR1970567	Produce	Mixed Fruit	GA	Prepackaged	2011-03-05	9	CC9	1/2c, 3c	no	69	75x	389865	99.9
Lm MBS-4162	CFSAN028672	SRR1973871	Produce	Mixed Fruit	GA	Prepackaged	2011-03-05	9	CC9	1/2c, 3c	no	71	79x	476320	99.9
Lm MBS-4181	CFSAN028673	SRR1974030	Seafood	Finfish Salad	CA	Prepackaged	2011-03-25	155	CC155	1/2a, 3a	no		259x	685811	99.4
Lm MBS-4182	CFSAN028674	SRR1970568	Seafood	Finfish Salad	CA	Prepackaged	2011-03-25	155	CC155	1/2a, 3a	no		108x	686393	99.6
Lm MBS-4196	CFSAN028675	SRR1974015	Seafood	Mixed seafood salad	CA	Made/ Sliced in Store	2011-03-25	155	CC155	1/2a, 3a	no		59x	522582	99.5
Lm MBS-4197	CFSAN028676	SRR1970569	Seafood	Mixed seafood salad	CA	Made/ Sliced in Store	2011-03-25	155	CC155	1/2a, 3a	no		37x	433878	99.6
Lm MBS-4206	CFSAN028677	SRR1973840	Seafood	Shrimp seafood salad	MD	Made/ Sliced in Store	2011-04-02	376	ST376	1/2a, 3a	no		23x	303384	99.6
Lm MBS-4207	CFSAN028678	SRR1973679	Seafood	Shrimp seafood salad	MD	Made/ Sliced in Store	2011-04-02	376	ST376	1/2a, 3a	no		41x	505895	99.8
Lm MBS-4216	CFSAN028679	SRR1973609	Seafood	Shrimp seafood salad	MD	Made/ Sliced in Store	2011-04-02	376	ST376	1/2a, 3a	no		82x	489774	99.8
Lm MBS-4217	CFSAN028680	SRR1974034	Seafood	Shrimp seafood salad	MD	Made/ Sliced in Store	2011-04-02	376	ST376	1/2a, 3a	no		71x	500376	99.8
Lm MBS-4231	CFSAN028681	SRR1973903	Combination foods	Deli-type Salad - Turkey Salad	MD	Made/ Sliced in Store	2011-04-02	155	CC155	1/2a, 3a	no		203x	476882	99.7
Lm MBS-4232	CFSAN028682	SRR1970570	Combination foods	Deli-type Salad - Turkey Salad	MD	Made/ Sliced in Store	2011-04-02	155	CC155	1/2a, 3a	no		236x	476882	99.6
Lm MBS-4241	CFSAN028683	SRR2124393	Combination foods	Deli-type Salad - Chicken Salad	MD	Made/ Sliced in Store	2011-04-02	155	CC155	1/2a, 3a	no		433x	476867	99.7
Lm MBS-4242	CFSAN028684	SRR2124540	Combination foods	Deli-type Salad - Chicken Salad	MD	Made/ Sliced in Store	2011-04-02	155	CC155	1/2a, 3a	no		366x	436189	99.7
Lm MBS-4381	CFSAN028685	SRR2124454	Combination foods	Egg salad	CA	Made/ Sliced in Store	2011-04-16	429	ST429	1/2b, 3b	no		433x	270040	99.5
Lm MBS-4382	CFSAN028686	SRR2124543	Combination foods	Egg salad	CA	Made/ Sliced in Store	2011-04-16	429	ST429	1/2b, 3b	no		366x	236693	99.5
Lm MBS-4391	CFSAN028687	SRR2124501	Combination foods	Egg sandwich	CA	Made/ Sliced in Store	2011-04-16	429	ST429	1/2b, 3b	no		321x	299052	99.6
Lm MBS-4392	CFSAN028688	SRR2124438	Combination foods	Egg sandwich	CA	Made/ Sliced in Store	2011-04-16	429	ST429	1/2b, 3b	no		153x	297599	99.5
Lm MBS-4406	CFSAN028689	SRR2124352	Combination foods	Macaroni/Pasta salad	GA	Made/ Sliced in Store	2011-04-30	5	CC5	1/2b, 3b	no	74	333x	235978	99.5
Lm MBS-4407	CFSAN028690	SRR2124307	Combination foods	Macaroni/Pasta salad	GA	Made/ Sliced in Store	2011-04-30	5	CC5	1/2b, 3b	no	76	293x	235860	99.5
Lm MBS-4465	CFSAN028691	SRR2124340	Combination foods	Chicken sandwiches	MD	Made/ Sliced in Store	2011-05-28	155	CC155	1/2a, 3a	no		248x	510526	99.6
Lm MBS-4466	CFSAN028692	SRR2124308	Combination foods	Chicken sandwiches	MD	Made/ Sliced in Store	2011-05-28	155	CC155	1/2a, 3a	no		215x	510472	99.6
Lm MBS-4485	CFSAN028693	SRR2124321	Seafood	Cold Smoked Salmon	GA	Prepackaged	2011-06-04	296	CC88	1/2b, 3b	no	82	267x	262531	99.2
Lm MBS-4486	CFSAN028694	SRR2124431	Seafood	Cold Smoked Salmon	GA	Prepackaged	2011-06-04	296	CC88	1/2b, 3b	no	82	286x	308158	99.2
Lm MBS-4495	CFSAN028695	SRR2124358	Seafood	Cold Smoked Salmon	GA	Prepackaged	2011-06-04	296	CC88	1/2b, 3b	no	82	320x	307928	99.2
Lm MBS-4496	CFSAN028696	SRR2124419	Seafood	Cold Smoked Salmon	GA	Prepackaged	2011-06-04	296	CC88	1/2b, 3b	no	82	52x	302025	99.2
Lm MBS-4511	CFSAN028697	SRR2124359	Produce	Cantaloupe	GA	Made/ Sliced in Store	2011-06-25	5	CC5	1/2b, 3b	yes	81	366x	343888	99.5
Lm MBS-4512	CFSAN028698	SRR2124432	Produce	Cantaloupe	GA	Made/ Sliced in Store	2011-06-25	5	CC5	1/2b, 3b	yes	83	333x	235629	99.5
Lm MBS-4521	CFSAN028699	SRR7947413	Combination foods	Macaroni/Pasta salad	GA	Made/ Sliced in Store	2011-06-25	5	CC5	1/2b, 3b	no	70	281x	204102	99.5
Lm MBS-4522	CFSAN028700	SRR2124544	Combination foods	Macaroni/Pasta salad	GA	Made/ Sliced in Store	2011-06-25	5	CC5	1/2b, 3b	no	70	366x	235856	99.5
Lm MBS-4531	CFSAN028701	SRR2124371	Combination foods	Chicken sandwiches	GA	Prepackaged	2011-06-25	5	CC5	1/2b, 3b	yes	80	333x	429712	99.5
Lm MBS-4532	CFSAN028702	SRR2124279	Combination foods	Chicken sandwiches	GA	Prepackaged	2011-06-25	321	CC321	1/2a, 3a	yes	67	367x	527649	99.8
Lm MBS-4576	CFSAN028703	SRR2124502	Combination foods	Chicken sandwiches	CT	Made/ Sliced in Store	2011-07-02	782	CC2	1/2b, 3b	no		533x	285459	99
Lm MBS-4577	CFSAN028704	SRR2124533	Combination foods	Chicken sandwiches	CT	Made/ Sliced in Store	2011-07-02	782	CC2	1/2b, 3b	no		333x	198174	99.2
Lm MBS-4731	CFSAN028711	SRR2124497	Combination foods	egg sandwich	MD	Made/ Sliced in Store	2011-08-04	155	CC155	1/2a, 3a	no	90	184x	509963	99.6
Lm MBS-4732	CFSAN028712	SRR2124353	Combination foods	egg sandwich	MD	Made/ Sliced in Store	2011-08-04	155	CC155	1/2a, 3a	no	90	156x	343954	99.6
Lm MBS-4776	CFSAN028713	SRR2124284	Combination foods	Potato Salad	MD	Made/ Sliced in Store	2011-09-01	1104	ST1104	L, lineage I	no		324x	358381	99.6
Lm MBS-4777	CFSAN028714	SRR2124294	Combination foods	Potato Salad	MD	Made/ Sliced in Store	2011-09-01	1104	ST1104	L, lineage I	no		263x	238973	99.5
Lm MBS-4801	CFSAN028715	SRR2124320	Combination foods	potato salad	MD	Made/ Sliced in Store	2011-09-01	321	CC321	1/2a, 3a	yes	70	566x	425084	99.7
Lm MBS-4802	CFSAN028716	SRR2124275	Combination foods	potato salad	MD	Made/ Sliced in Store	2011-09-01	321	CC321	1/2a, 3a	yes	70	533x	474963	99.8
Lm MBS-4921	CFSAN028717	SRR2124287	Combination foods	egg salad	MD	Made/ Sliced in Store	2011-11-02	155	CC155	1/2a, 3a	no	90	297x	508981	99.7
Lm MBS-4922	CFSAN028718	SRR2124280	Combination foods	egg salad	MD	Made/ Sliced in Store	2011-11-02	155	CC155	1/2a, 3a	no	90	366x	427291	99.7
Lm MBS-4931	CFSAN028719	SRR2124414	Combination foods	egg sandwich	MD	Made/ Sliced in Store	2011-11-02	155	CC155	1/2a, 3a	no	90	600x	433805	99.7
Lm MBS-4932	CFSAN028720	SRR2124420	Combination foods	egg sandwich	MD	Made/ Sliced in Store	2011-11-02	155	CC155	1/2a, 3a	no	90	125x	480132	99.6
Lm MBS-4455	CFSAN028721	SRR2124295	Combination foods	Egg Sandwich	MD	Made/ Sliced in Store	2011-05-28	155	CC155	1/2a, 3a	no	90	322x	509582	99.6
Lm MBS-4456	CFSAN028722	SRR2124415	Combination foods	Egg Sandwich	MD	Made/ Sliced in Store	2011-05-28	155	CC155	1/2a, 3a	no	90	260x	454789	99.4
Lm MBS-4566	CFSAN028723	SRR2124400	Combination foods	Macaroni/Pasta Salad	CT	Prepackaged	2011-07-02	910	CC910	1/2a, 3a	no		333x	375679	99.9
Lm MBS-4567	CFSAN028724	SRR2124372	Combination foods	Macaroni/Pasta Salad	CT	Prepackaged	2011-07-02	910	CC910	1/2a, 3a	no		366x	399748	99.9
Lm MBS-4716	CFSAN028725	SRR2124444	Seafood	Cold smoked finfish	CT	Prepackaged	2011-07-23	121	CC121	1/2a, 3a	no		366x	436129	99.9
Lm MBS-4717	CFSAN028726	SRR2124529	Seafood	Cold smoked finfish	CT	Prepackaged	2011-07-23	121	CC121	1/2a, 3a	no		466x	481287	99.9
Lm MBS-4976	CFSAN028727	SRR2124530	Produce	cantaloupe	CT	Made/ Sliced in Store	2011-12-07	199	CC199	1/2a, 3a	no	70	366x	656282	99.7
Lm MBS-4977	CFSAN028728	SRR2124346	Produce	cantaloupe	CT	Made/ Sliced in Store	2011-12-07	199	CC199	1/2a, 3a	no	70	321x	1497156	99.7
Lm MBS-4986	CFSAN028729	SRR2124546	Combination foods	egg salad	CT	Made/ Sliced in Store	2011-12-07	199	CC199	1/2a, 3a	no	70	366x	523748	99.7
Lm MBS-4987	CFSAN028730	SRR2124521	Combination foods	egg salad	CT	Made/ Sliced in Store	2011-12-07	199	CC199	1/2a, 3a	no	70	500x	524060	99.7
Lm MBS-4996	CFSAN028731	SRR2124322	Dairy	raw milk	CT	Prepackaged	2011-12-07	379	CC379	1/2b, 3b	no		215x	320760	99.6
Lm MBS-4997	CFSAN028732	SRR2124519	Dairy	raw milk	CT	Prepackaged	2011-12-07	379	CC379	1/2b, 3b	no		366x	258466	99.6
Lm MBS-5006	CFSAN028733	SRR2124375	Dairy	raw milk	CT	Prepackaged	2011-12-07	379	CC379	1/2b, 3b	no		190x	294216	99.6
Lm MBS-5007	CFSAN028734	SRR2124276	Dairy	raw milk	CT	Prepackaged	2011-12-07	379	CC379	1/2b, 3b	no		466x	294217	99.6
Lm MBS-5016	CFSAN028735	SRR2124536	Dairy	raw milk	CT	Prepackaged	2011-12-07	379	CC379	1/2b, 3b	no		321x	478085	99.5
Lm MBS-5017	CFSAN028736	SRR2124489	Dairy	raw milk	CT	Prepackaged	2011-12-07	379	CC379	1/2b, 3b	no		304x	502759	99.5
Lm MBS-5056	CFSAN028737	SRR2124272	Produce	watermelon	GA	Prepackaged	2012-02-22	5	CC5	1/2b, 3b	no	70	74x	235619	99.3
Lm MBS-5057	CFSAN028738	SRR2124277	Produce	watermelon	GA	Prepackaged	2012-02-22	5	CC5	1/2b, 3b	no	70	61x	256865	99.5
Lm MBS-5136	CFSAN028739	SRR2124362	Combination foods	Egg Salad	CT	Made/ Sliced in Store	2012-03-30	199	CC199	1/2a, 3a	no	70	111x	523899	99.7
Lm MBS-5137	CFSAN028740	SRR2124545	Combination foods	Egg Salad	CT	Made/ Sliced in Store	2012-03-30	199	CC199	1/2a, 3a	no	70	500x	430891	98.5
Lm MBS-5146	CFSAN028741	SRR2124323	Combination foods	Egg Salad	CT	Prepackaged	2012-03-30	199	CC199	1/2a, 3a	no	70	600x	1497830	99.7
Lm MBS-5147	CFSAN028742	SRR2124281	Combination foods	Egg Salad	CT	Prepackaged	2012-03-30	199	CC199	1/2a, 3a	no	70	400x	657174	99.7
Lm MBS-5227	CFSAN028743	SRR2124335	Combination foods	Egg Salad	MD	Made/ Sliced in Store	2012-05-04	155	CC155	1/2a, 3a	no	90	137x	479466	99.7
Lm MBS-5228	CFSAN028744	SRR2124520	Combination foods	Egg Salad	MD	Made/ Sliced in Store	2012-05-04	155	CC155	1/2a, 3a	no	90	209x	420625	99.7
Lm MBS-5257	CFSAN028745	SRR2124285	Produce	Raw, Cut Vegetables	CA	Prepackaged	2012-05-09	392	ST392	1/2b, 3b	no		244x	247643	99.5
Lm MBS-5258	CFSAN028746	SRR2124328	Produce	Raw, Cut Vegetables	CA	Prepackaged	2012-05-09	392	ST392	1/2b, 3b	no		168x	235844	99.5
Lm MBS-5344	CFSAN028747	SRR2124309	Produce	Raw, Cut Vegetables	MD	Prepackaged	2012-06-09	6	CC6	4b, 4d, 4e	no		65x	121110	99.3
Lm MBS-5345	CFSAN028748	SRR2124510	Produce	Raw, Cut Vegetables	MD	Prepackaged	2012-06-09	6	CC6	4b, 4d, 4e	no		57x	240365	99.4
Lm MBS-5741	CFSAN028749	SRR2124490	Produce	Raw, Cut Vegetables	MD	Prepackaged	2012-07-07	489	ST489	1/2b, 3b	no		262x	293800	99.5
Lm MBS-5742	CFSAN028750	SRR2124273	Produce	Raw, Cut Vegetables	MD	Prepackaged	2012-07-07	489	ST489	1/2b, 3b	no		466x	294355	99.5
Lm MBS-5816	CFSAN028751	SRR2124342	Produce	Raw, Cut Vegetables	CA	Prepackaged	2012-08-01	1	CC1	4b, 4d, 4e	no		400x	263190	99.4
Lm MBS-5817	CFSAN028752	SRR2124347	Produce	Raw, Cut Vegetables	CA	Prepackaged	2012-08-01	1	CC1	4b, 4d, 4e	no		255x	285320	99.3
Lm MBS-5826	CFSAN028753	SRR2124314	Produce	Raw, Cut Vegetables	CA	Made/ Sliced in Store	2012-08-01	1	CC1	4b, 4d, 4e	no		301x	301408	99.3
Lm MBS-5827	CFSAN028754	SRR2124329	Produce	Raw, Cut Vegetables	CA	Made/ Sliced in Store	2012-08-01	1	CC1	4b, 4d, 4e	no		233x	260224	99.3
Lm MBS-6011	CFSAN028755	SRR2124386	Combination foods	Chicken Sandwich	GA	Made/ Sliced in Store	2012-08-08	87	CC87	1/2b, 3b	no		254x	505629	99.2
Lm MBS-6012	CFSAN028756	SRR2124404	Combination foods	Chicken Sandwich	GA	Made/ Sliced in Store	2012-08-08	87	CC87	1/2b, 3b	no		223x	309915	99.3
Lm MBS-6262	CFSAN028757	SRR2124511	Produce	Raw, Cut Vegetables	MD	Prepackaged	2012-09-15	299	CC131	L, lineage III	no		333x	523643	99.2
Lm MBS-6263	CFSAN028758	SRR2124428	Produce	Raw, Cut Vegetables	MD	Prepackaged	2012-09-15	299	CC131	L, lineage III	no		500x	1451978	99.2
Lm MBS-6272	CFSAN028759	SRR2124367	Produce	Raw, Cut Vegetables	MD	Prepackaged	2012-09-15	299	CC131	L, lineage III	no		333x	1452216	99.2
Lm MBS-6273	CFSAN028760	SRR2124387	Produce	Raw, Cut Vegetables	MD	Prepackaged	2012-09-15	299	CC131	L, lineage III	no		264x	1451429	99.2
Lm MBS-6312	CFSAN028761	SRR2124384	Produce	Watermelon	GA	Made/ Sliced in Store	2012-11-03	1125	ST1125	1/2a, 3a	no		298x	1515500	99.6
Lm MBS-6313	CFSAN028762	SRR2124296	Produce	Watermelon	GA	Made/ Sliced in Store	2012-11-03	1125	ST1125	1/2a, 3a	no		87x	358132	99.6
Lm MBS-6346	CFSAN028763	SRR2124354	Combination foods	Egg Salad	MD	Made/ Sliced in Store	2012-11-24	155	CC155	1/2a, 3a	no	90	120x	433622	99.6
Lm MBS-6347	CFSAN028764	SRR2124522	Combination foods	Egg Salad	MD	Made/ Sliced in Store	2012-11-24	155	CC155	1/2a, 3a	no	90	82x	292645	99.6
Lm MBS-6356	CFSAN028765	SRR2124388	Combination foods	Potato Salad	MD	Made/ Sliced in Store	2012-11-24	155	CC155	1/2a, 3a	no	90	23x	118387	98.6
Lm MBS-6357	CFSAN028766	SRR2124330	Combination foods	Potato Salad	MD	Made/ Sliced in Store	2012-11-24	155	CC155	1/2a, 3a	no	90	240x	510049	99.6
Lm MBS-6366	CFSAN028767	SRR2124383	Combination foods	Potato Salad	MD	Made/ Sliced in Store	2012-11-24	388	CC388	4b, 4d, 4e	no		239x	301827	99.7
Lm MBS-6367	CFSAN028768	SRR2124523	Combination foods	Potato Salad	MD	Made/ Sliced in Store	2012-11-24	155	CC155	1/2a, 3a	no	90	215x	480134	99.6
Lm MBS-6402	CFSAN028769	SRR2124514	Produce	Raw, Cut Vegetables	GA	Made/ Sliced in Store	2012-11-28	930	CC177	1/2a, 3a	no		195x	1498115	99.8
Lm MBS-6403	CFSAN028770	SRR2124385	Produce	Raw, Cut Vegetables	GA	Made/ Sliced in Store	2012-11-28	930	CC177	1/2a, 3a	no		163x	1462527	99.8
Lm MBS-6412	CFSAN028771	SRR2124491	Seafood	Surimi seafood salad	GA	Prepackaged	2012-11-28	226	ST226	1/2a, 3a	no		291x	500085	99.3
Lm MBS-6413	CFSAN028772	SRR2124405	Seafood	Surimi seafood salad	GA	Prepackaged	2012-11-28	226	ST226	1/2a, 3a	no		270x	522961	99.9
Lm MBS-6455	CFSAN028773	SRR2124288	Combination foods	Egg Salad	MD	Prepackaged	2013-01-05	155	CC155	1/2a, 3a	no	90	223x	436256	99.6
Lm MBS-6456	CFSAN028774	SRR2124421	Combination foods	Egg salad	MD	Prepackaged	2013-01-05	388	CC388	4b, 4d, 4e	no		197x	302073	99.6
Lm MBS-6465	CFSAN028775	SRR2124517	Combination foods	Egg salad	MD	Prepackaged	2013-01-05	155	CC155	1/2a, 3a	no	89	279x	479620	99.7
Lm MBS-6466	CFSAN028776	SRR2124429	Combination foods	Egg salad	MD	Prepackaged	2013-01-05	155	CC155	1/2a, 3a	no	90	277x	510063	99.6
Lm MBS-6475	CFSAN028777	SRR2124531	Combination foods	Potato salad	MD	Made/ Sliced in Store	2013-01-05	155	CC155	1/2a, 3a	no	90	330x	480010	99.6
Lm MBS-6476	CFSAN028778	SRR2124406	Combination foods	Potato salad	MD	Made/ Sliced in Store	2013-01-05	155	CC155	1/2a, 3a	no	90	164x	509561	99.6
Lm MBS-6485	CFSAN028779	SRR2924581	Combination foods	Potato salad	MD	Made/ Sliced in Store	2013-01-05	155	CC155	1/2a, 3a	no	89	67x	433654	99.6
Lm MBS-6486	CFSAN028780	SRR2924582	Combination foods	Potato salad	MD	Made/ Sliced in Store	2013-01-05	155	CC155	1/2a, 3a	no	89	177x	509753	99.7
Lm MBS-6495	CFSAN028781	SRR2924583	Produce	Mushrooms	MD	Prepackaged	2013-01-05	4	CC4	4b, 4d, 4e	no		93x	430530	99.6
Lm MBS-6496	CFSAN028782	SRR2924584	Produce	Mushrooms	MD	Prepackaged	2013-01-05	4	CC4	4b, 4d, 4e	no		131x	544867	99.6
Lm MBS-6515	CFSAN028783	SRR2924585	Produce	Mushrooms	GA	Prepackaged	2013-01-16	9	CC9	1/2c, 3c	no	63	106x	511810	99.9
Lm MBS-6516	CFSAN028784	SRR2924586	Produce	Mushrooms	GA	Prepackaged	2013-01-16	9	CC9	1/2c, 3c	no	63	92x	479920	99.9
Lm MBS-6525	CFSAN028785	SRR2924587	Produce	Mushrooms	CA	Prepackaged	2013-01-23	7	CC7	1/2a, 3a	no	85	149x	437219	99.8
Lm MBS-6526	CFSAN028786	SRR2924588	Produce	Mushrooms	CA	Prepackaged	2013-01-23	7	CC7	1/2a, 3a	no	85	155x	436952	99.8
Lm MBS-6535	CFSAN028787	SRR2924589	Produce	Mushrooms	CA	Prepackaged	2013-01-23	7	CC7	1/2a, 3a	no	86	103x	436952	99.8
Lm MBS-6536	CFSAN028788	SRR2924590	Produce	Mushrooms	CA	Prepackaged	2013-01-23	7	CC7	1/2a, 3a	no	83	69x	436820	99.8
Lm MBS-6545	CFSAN028789	SRR2924591	Produce	Mushrooms	CA	Prepackaged	2013-01-23	7	CC7	1/2a, 3a	no	86	85x	436595	99.8
Lm MBS-6546	CFSAN028790	SRR2924592	Produce	Mushrooms	CA	Prepackaged	2013-01-23	7	CC7	1/2a, 3a	no	86	111x	437064	99.8
Lm MBS-6578	CFSAN028791	SRR2924593	Dairy	Soft Ripened Cheese	MD	Prepackaged	2013-01-30	6	CC6	4b, 4d, 4e	no		91x	298746	99.5
Lm MBS-6579	CFSAN028792	SRR2924594	Dairy	Soft Ripened Cheese	MD	Prepackaged	2013-01-30	6	CC6	4b, 4d, 4e	no		97x	368079	99.5
Lm MBS-6611	CFSAN028793	SRR2924595	Seafood	Mixed Seafood Salad	CT	Made/ Sliced in Store	2013-02-23	5	CC5	1/2b, 3b	yes	149	117x	537017	99.4
Lm MBS-6612	CFSAN028794	SRR2924596	Seafood	Mixed Seafood Salad	CT	Made/ Sliced in Store	2013-02-23	5	CC5	1/2b, 3b	yes	149	121x	537189	99.4
Lm MBS-6621	CFSAN028795	SRR2924597	Dairy	Regular Butter	CT	Prepackaged	2013-02-23	7	CC7	1/2a, 3a	no	83	62x	436552	99.8
Lm MBS-6622	CFSAN028796	SRR2924598	Dairy	Regular Butter	CT	Prepackaged	2013-02-23	7	CC7	1/2a, 3a	no	83	98x	359350	99.8
Lm MBS-6696	CFSAN028797	SRR2924599	Produce	Cantaloupe	MD	Made/ Sliced in Store	2013-03-02	6	CC6	4b, 4d, 4e	no		88x	355977	99.6
Lm MBS-6697	CFSAN028798	SRR2924600	Produce	Cantaloupe	MD	Made/ Sliced in Store	2013-03-02	6	CC6	4b, 4d, 4e	no		174x	265318	99.6
Lm MBS-6706	CFSAN028799	SRR2924601	Dairy	Fresh Cheese	MD	Prepackaged	2013-02-28	199	CC199	1/2a, 3a	no	38	165x	567499	99.7
Lm MBS-6707	CFSAN028800	SRR2924602	Dairy	Fresh Cheese	MD	Prepackaged	2013-02-28	199	CC199	1/2a, 3a	no	38	167x	567860	99.7
Lm MBS-6716	CFSAN028801	SRR2924603	Dairy	Soft Ripened Cheese	MD	Prepackaged	2013-02-25	635	ST635	1/2a, 3a	yes	136	205x	498662	99.8
Lm MBS-6717	CFSAN028802	SRR2924604	Dairy	Soft Ripened Cheese	MD	Prepackaged	2013-02-25	635	ST635	1/2a, 3a	yes	136	188x	553350	99.8
Lm MBS-6726	CFSAN028803	SRR2924557	Dairy	Semi Soft Cheese	MD	Prepackaged	2013-02-27	6	CC6	4b, 4d, 4e	no		66x	317051	99.3
Lm MBS-6727	CFSAN028804	SRR2924558	Dairy	Semi Soft Cheese	MD	Prepackaged	2013-02-27	6	CC6	4b, 4d, 4e	no		100x	509837	99.5
LM MBS-4631	CFSAN028805	SRR2924559	Meat	deli meats - ham	MD	Made/ Sliced in Store	2011-07-09	1041	ST1041	1/2b, 3b	no	0	65x	198863	99.4
LM MBS-4632	CFSAN028806	SRR2924560	Meat	deli meats - ham	MD	Made/ Sliced in Store	2011-07-09	1041	ST1041	1/2b, 3b	no	72	48x	166244	99.5
LM MBS-4756	CFSAN028807	SRR2924561	Meat	deli meats - cooked ham	CT	Made/ Sliced in Store	2011-08-17	321	CC321	1/2a, 3a	yes	67	91x	211440	99.7
LM MBS-4757	CFSAN028808	SRR2924562	Meat	deli meats - cooked ham	CT	Made/ Sliced in Store	2011-08-17	321	CC321	1/2a, 3a	yes	67	50x	229831	99.7
LM MBS-5081	CFSAN028809	SRR2924563	Meat	deli meats - ham	GA	Made/ Sliced in Store	2012-03-14	321	CC321	1/2a, 3a	yes	67	35x	366851	99.7
LM MBS-5082	CFSAN028810	SRR2924564	Meat	deli meats - ham	GA	Made/ Sliced in Store	2012-03-14	321	CC321	1/2a, 3a	yes	67	52x	285000	99.8
LM MBS-5091	CFSAN028811	SRR2924565	Meat	deli meats - chicken deli	GA	Made/ Sliced in Store	2012-03-14	321	CC321	1/2a, 3a	yes	67	87x	366853	99.8
LM MBS-5092	CFSAN028812	SRR2924566	Meat	deli meats - chicken deli	GA	Made/ Sliced in Store	2012-03-14	321	CC321	1/2a, 3a	yes	67	112x	211680	99.8
LM MBS-5216	CFSAN028813	SRR2924567	Meat	deli meats - turkey mesquite	CT	Made/ Sliced in Store	2012-04-28	321	CC321	1/2a, 3a	yes	67	152x	412360	99.8
LM MBS-5217	CFSAN028814	SRR2924568	Meat	deli meats - turkey mesquite	CT	Made/ Sliced in Store	2012-04-28	321	CC321	1/2a, 3a	yes	67	145x	366853	99.8
LM MBS-5237	CFSAN028815	SRR2924569	Meat	deli meats - ham tavern	MD	Made/ Sliced in Store	2012-05-04	5	CC5	1/2b, 3b	no	74	122x	165471	99.6
LM MBS-5238	CFSAN028816	SRR2924570	Meat	deli meats - ham tavern	MD	Made/ Sliced in Store	2012-05-04	5	CC5	1/2b, 3b	no	74	174x	245108	99.5
LM MBS-5317	CFSAN028817	SRR2924571	Meat	deli meats - honey bbq chicken	MD	Made/ Sliced in Store	2012-05-19	5	CC5	1/2b, 3b	no	69	142x	166279	99.4
LM MBS-5318	CFSAN028818	SRR2924572	Meat	deli meats - honey bbq chicken	MD	Made/ Sliced in Store	2012-05-19	5	CC5	1/2b, 3b	no	69	158x	231937	99.4
LM MBS-5481	CFSAN028819	SRR2924573	Meat	deli meats - ham	GA	Made/ Sliced in Store	2012-06-20	101	CC101	1/2a, 3a	no		105x	242360	99.7
LM MBS-5482	CFSAN028820	SRR2924574	Meat	deli meats - ham	GA	Made/ Sliced in Store	2012-06-20	101	CC101	1/2a, 3a	no		82x	242360	99.7
LM MBS-5491	CFSAN028821	SRR2924575	Meat	deli meats - deli chicken	GA	Made/ Sliced in Store	2012-06-20	1	CC1	4b, 4d, 4e	no		95x	353303	99.4
LM MBS-5492	CFSAN028822	SRR2924576	Meat	deli meats - deli chicken	GA	Made/ Sliced in Store	2012-06-20	1	CC1	4b, 4d, 4e	no		113x	355168	99.5
LM MBS-5731	CFSAN028823	SRR2924577	Meat	dried/fermented sausage - labanon balogna	GA	Made/ Sliced in Store	2012-07-07	1	CC1	4b, 4d, 4e	no		198x	353139	99.5
LM MBS-5732	CFSAN028824	SRR2924578	Meat	dried/fermented sausage - labanon balogna	GA	Made/ Sliced in Store	2012-07-07	1	CC1	4b, 4d, 4e	no		66x	356912	99.4
LM MBS-6021	CFSAN028825	SRR2924579	Combination foods	Deli-type Salad - chicken salad	GA	Made/ Sliced in Store	2012-08-08	87	CC87	1/2b, 3b	no		85x	353954	99.3
LM MBS-6022	CFSAN028826	SRR2924580	Combination foods	Deli-type Salad - chicken salad	GA	Made/ Sliced in Store	2012-08-08	87	CC87	1/2b, 3b	no		109x	353870	99.3
LM MBS-6031	CFSAN028827	SRR2960757	Meat	deli meats - honey smoked turkey	GA	Made/ Sliced in Store	2012-08-08	87	CC87	1/2b, 3b	no		366x	354073	99.3
LM MBS-6032	CFSAN028828	SRR2960759	Meat	deli meats - honey smoked turkey	GA	Made/ Sliced in Store	2012-08-08	87	CC87	1/2b, 3b	no		43x	165130	99.3
LM MBS-6041	CFSAN028829	SRR2960760	Meat	deli meats - turkey smoked	GA	Made/ Sliced in Store	2012-08-08	87	CC87	1/2b, 3b	no		70x	258382	99.3
LM MBS-6042	CFSAN028830	SRR2960761	Meat	deli meats - turkey smoked	GA	Made/ Sliced in Store	2012-08-08	87	CC87	1/2b, 3b	no		45x	193551	99.3
LM MBS-6051	CFSAN028831	SRR2960762	Meat	deli meats - oven roasted turkey	GA	Made/ Sliced in Store	2012-08-08	87	CC87	1/2b, 3b	no		50x	151918	99.3
LM MBS-6052	CFSAN028832	SRR2960763	Meat	deli meats - oven roasted turkey	GA	Made/ Sliced in Store	2012-08-08	87	CC87	1/2b, 3b	no		59x	273424	99.3
LM MBS-6061	CFSAN028833	SRR2960764	Meat	deli meats - low sodium turkey	GA	Made/ Sliced in Store	2012-08-08	87	CC87	1/2b, 3b	no		74x	348373	99.3
LM MBS-6062	CFSAN028834	SRR2960765	Meat	deli meats - low sodium turkey	GA	Made/ Sliced in Store	2012-08-08	87	CC87	1/2b, 3b	no		59x	251230	99.3
LM MBS-6071	CFSAN028835	SRR2960766	Meat	deli meats - oven roasted chicken	GA	Made/ Sliced in Store	2012-08-08	87	CC87	1/2b, 3b	no		63x	208970	99.3
LM MBS-6072	CFSAN028836	SRR2960767	Meat	deli meats - oven roasted chicken	GA	Made/ Sliced in Store	2012-08-08	87	CC87	1/2b, 3b	no		65x	148105	99.3
LM MBS-6081	CFSAN028837	SRR2960768	Meat	deli meats - corned beef	GA	Made/ Sliced in Store	2012-08-08	87	CC87	1/2b, 3b	no		32x	182608	99.2
LM MBS-6082	CFSAN028838	SRR2960769	Meat	deli meats - corned beef	GA	Made/ Sliced in Store	2012-08-08	87	CC87	1/2b, 3b	no		41x	169185	99.3
Lm MBS-6676	CFSAN028886	SRR2960770	Seafood	Mixed seafood salad	MD	Made/ Sliced in Store	2013-03-02	6	CC6	4b, 4d, 4e	no		34x	550170	99.6
Lm MBS-6677	CFSAN028887	SRR2960771	Seafood	Mixed seafood salad	MD	Made/ Sliced in Store	2013-03-02	6	CC6	4b, 4d, 4e	no		61x	554990	99.6
Lm MBS-6686	CFSAN028888	SRR2960775	Seafood	Shrimp seafood salad	MD	Made/ Sliced in Store	2013-03-02	199	CC199	1/2a, 3a	no	38	96x	1497276	99.7
Lm MBS-6687	CFSAN028889	SRR2960776	Seafood	Shrimp seafood salad	MD	Made/ Sliced in Store	2013-03-02	199	CC199	1/2a, 3a	no	38	118x	1497575	99.7
Lm MBS-6432	CFSAN028890	SRR2960777	Combination foods	Sandwich	CT	Made/ Sliced in Store	2012-12-08	321	CC321	1/2a, 3a	yes	67	112x	569814	99.8
Lm MBS-6433	CFSAN028891	SRR2960778	Combination foods	Sandwich	CT	Made/ Sliced in Store	2012-12-08	321	CC321	1/2a, 3a	yes	67	99x	569783	99.8
Lm MBS-5836	CFSAN028892	SRR2960779	Combination foods	Chicken Sandwich	MD	Made/ Sliced in Store	2012-07-07	1	CC1	4b, 4d, 4e	no		68x	1467714	99.5
Lm MBS-5837	CFSAN028893	SRR2960780	Combination foods	Chicken Sandwich	MD	Made/ Sliced in Store	2012-07-07	1	CC1	4b, 4d, 4e	no		98x	1469023	99.5
Lm MBS-5896	CFSAN028894	SRR2960781	Produce	Raw, Cut Vegetables	MD	Prepackaged	2012-07-07	489	ST489	1/2b, 3b	no		104x	504963	99.5
Lm MBS-5897	CFSAN028895	SRR2960782	Produce	Raw, Cut Vegetables	MD	Prepackaged	2012-07-07	489	ST489	1/2b, 3b	no		78x	476838	99.5
Lm MBS-5906	CFSAN028896	SRR2960783	Produce	Raw, Cut Celery	MD	Prepackaged	2012-07-07	1	CC1	4b, 4d, 4e	no		118x	1469737	99.5
Lm MBS-5907	CFSAN028897	SRR2960784	Produce	Raw, Cut Celery	MD	Prepackaged	2012-07-07	1	CC1	4b, 4d, 4e	no		105x	1469046	99.5
Lm MBS-5916	CFSAN028898	SRR2960785	Produce	Raw, Cut Vegetables	MD	Made/ Sliced in Store	2012-07-07	1	CC1	4b, 4d, 4e	no		88x	564170	99.5
Lm MBS-5917	CFSAN028899	SRR2960786	Produce	Raw, Cut Vegetables	MD	Made/ Sliced in Store	2012-07-07	1	CC1	4b, 4d, 4e	no		90x	1468967	99.3
Lm MBS-5926	CFSAN028900	SRR2960787	Produce	Raw, Cut Vegetables	MD	Prepackaged	2012-07-07	1	CC1	4b, 4d, 4e	no		113x	1469033	99.5
Lm MBS-5927	CFSAN028901	SRR2960788	Produce	Raw, Cut Vegetables	MD	Prepackaged	2012-07-07	1	CC1	4b, 4d, 4e	no		102x	668170	99.5
Lm MBS-5936	CFSAN028902	SRR2960789	Produce	Raw, Cut Vegetables	MD	Prepackaged	2012-07-07	1	CC1	4b, 4d, 4e	no		95x	302023	99.5
Lm MBS-5937	CFSAN028903	SRR2960790	Produce	Raw, Cut Vegetables	MD	Prepackaged	2012-07-07	1	CC1	4b, 4d, 4e	no		70x	356848	99.5
aOf the 186 highlighted isolates, each pair of two isolates (with adjacent number and highlighted in the same color, e.g., LmMBS-4036 and LmMBS-4037) were obtained from the same positive food sample and were found to be likely the same strain; the two isolates were considered as duplicates of each other and only one was used in the analysis of genetic diversity and in other subsequent analyses. T…
